# Supplementary material for: Associations of Dietary Diversity Trajectories with Frailty among Chinese Older Adults: A Latent Class Trajectory Analysis Based on a CLHLS Cohort
Source: MDPI journal article supplement (doi:10.3390/nu16101445), 2024-05-10
Supplement: s1 [file s1]

**Table S1: List of items included in the frailty index**

| <b>No</b> | <b>Items</b>                                                      | <b>Coding of variables</b>                                    |
|-----------|-------------------------------------------------------------------|---------------------------------------------------------------|
| 1         | Needs assistance bathing                                          | Yes=1.00; no=0.00                                             |
| 2         | Needs assistance dressing                                         | Yes=1.00; no=0.00                                             |
| 3         | Needs assistance toileting                                        | Yes=1.00; no=0.00                                             |
| 4         | Needs assistance in indoor transferring                           | Yes=1.00; no=0.00                                             |
| 5         | Needs assistance eating                                           | Yes=1.00; no=0.00                                             |
| 6         | Incontinence                                                      | Yes=1.00; no=0.00                                             |
| 7         | Unable to visit neighbors by oneself                              | Yes=1.00; no=0.00                                             |
| 8         | Unable to shop by oneself if necessary                            | Yes=1.00; no=0.00                                             |
| 9         | Unable to cook meals by oneself if necessary                      | Yes=1.00; no=0.00                                             |
| 10        | Unable to wash clothing by oneself                                | Yes=1.00; no=0.00                                             |
| 11        | Unable to walk continuously for 1 kilometer                       | Yes=1.00; no=0.00                                             |
| 12        | Unable to lift a weight of 5 kg                                   | Yes=1.00; no=0.00                                             |
| 13        | Unable to continuously crouch and stand up three times            | Yes=1.00; no=0.00                                             |
| 14        | Unable to use public transportation                               | Yes=1.00; no=0.00                                             |
| 15        | Unable to put hand behind neck                                    | Yes=1.00; no=0.00                                             |
| 16        | Unable to put hand behind lower back                              | Yes=1.00; no=0.00                                             |
| 17        | Unable to raise arm upright                                       | Yes=1.00; no=0.00                                             |
| 18        | Unable to stand up from sitting in a chair                        | Yes=1.00; no=0.00                                             |
| 19        | Unable to pick up a book from the floor                           | Yes=1.00; no=0.00                                             |
| 20        | Cognitively impaired (based on the Mini Mental State Examination) | <6=1.00;<br>≥6 and <12=0.75;<br>≥12 and <18=0.25;<br>≥18=0.00 |
| 21        | Poor self-rated health                                            | Yes=1.00; no=0.00                                             |
| 22        | Poor interviewer-rated health                                     | Yes=1.00; no=0.00                                             |
| 23        | Number of serious illnesses in the past                           | 0=0.00;<br>1=1.00;<br>≥2=2.00                                 |

| <b>No</b> | <b>Items</b>                                               | <b>Coding of variables</b> |
|-----------|------------------------------------------------------------|----------------------------|
| 24        | Loneliness of psychological distress                       | Yes=1.00; no=0.00          |
| 25        | usefulness of psychological distress                       | Yes=1.00; no=0.00          |
| 26        | fearfulness of psychological distress                      | Yes=1.00; no=0.00          |
| 27        | Suffering from hypertension                                | Yes=1.00; no=0.00          |
| 28        | Suffering from diabetes                                    | Yes=1.00; no=0.00          |
| 29        | Suffering from tuberculosis                                | Yes=1.00; no=0.00          |
| 30        | Suffering from heart disease                               | Yes=1.00; no=0.00          |
| 31        | Suffering from stroke/cerebrovascular disease              | Yes=1.00; no=0.00          |
| 32        | Suffering from bronchitis, emphysema, asthma, or pneumonia | Yes=1.00; no=0.00          |
| 33        | Suffering from cancer                                      | Yes=1.00; no=0.00          |
| 34        | Suffering from arthritis                                   | Yes=1.00; no=0.00          |
| 35        | Suffering from bedsores                                    | Yes=1.00; no=0.00          |
| 36        | Suffering from gastric or duodenal ulcers                  | Yes=1.00; no=0.00          |
| 37        | Suffering from Parkinson's disease                         | Yes=1.00; no=0.00          |

**Table S2: Food intake frequency and scoring criteria**

| <b>No</b> | <b>Varieties</b>   | <b>Coding of variables</b>                                      |
|-----------|--------------------|-----------------------------------------------------------------|
| 1         | Fruit              | daily or often=1;<br>occasionally or hardly ever=0              |
| 2         | Vegetable          | daily or often=1;<br>occasionally or hardly ever=0              |
| 3         | Meat               | daily or weekly=1;<br>monthly or occasionally or almost never=0 |
| 4         | Fish               | daily or weekly=1;<br>monthly or occasionally or almost never=0 |
| 5         | Eggs               | daily or weekly=1;<br>monthly or occasionally or almost never=0 |
| 6         | Bean products      | daily or weekly=1;<br>monthly or occasionally or almost never=0 |
| 7         | Salted vegetables  | daily or weekly=1;<br>monthly or occasionally or almost never=0 |
| 8         | Sugar              | daily or weekly=1;<br>monthly or occasionally or almost never=0 |
| 9         | Garlic             | daily or weekly=1;<br>monthly or occasionally or almost never=0 |
| 10        | Milk products      | daily or weekly=1;<br>monthly or occasionally or almost never=0 |
| 11        | Nut products       | daily or weekly=1;<br>monthly or occasionally or almost never=0 |
| 12        | Mushrooms or algae | daily or weekly=1;<br>monthly or occasionally or almost never=0 |
| 13        | Tea                | daily or weekly=1;<br>monthly or occasionally or almost never=0 |

**Table S3: Fitting statistics for DVS trajectories**

|                              | Number of trajectory |       |       |          |       |       |          |       |       |         |       |       |
|------------------------------|----------------------|-------|-------|----------|-------|-------|----------|-------|-------|---------|-------|-------|
|                              | 2                    |       |       | 3        |       |       | 4        |       |       | 5       |       |       |
| BIC <sup>a</sup>             | 37725.6              |       |       | 37771.93 |       |       | 37807.95 |       |       | 37832.3 |       |       |
| Class1(n%/APP <sup>b</sup> ) | 810                  | 40.16 | 0.716 | 307      | 15.22 | 0.716 | 83       | 4.12  | 0.493 | 0       | 0     | 0     |
| Class2(n%/APP <sup>b</sup> ) | 1207                 | 59.84 | 0.743 | 1417     | 70.25 | 0.685 | 1434     | 71.10 | 0.679 | 601     | 29.80 | 0.742 |
| Class3(n%/APP <sup>b</sup> ) | /                    | /     | /     | 293      | 14.53 | 0.711 | 159      | 7.88  | 0.493 | 1323    | 65.59 | 0.732 |
| Class4(n%/APP <sup>b</sup> ) | /                    | /     | /     | /        | /     | /     | 341      | 16.91 | 0.717 | 93      | 4.61  | 0.643 |
| Class5(n%/APP <sup>b</sup> ) | /                    | /     | /     | /        | /     | /     | /        | /     | /     | 0       | 0     | 0     |

a: The lower absolute value shows a better model fit; b: The higher value is better ( $> 0.7$  in a class), BIC: Bayesian information criteria; APP average posterior probabilities.

**Table S4: The prevalence of frailty**

| Prevalence of frailty (%) | Sex   |        | Total |
|---------------------------|-------|--------|-------|
|                           | Male  | Female |       |
| Age (years)               |       |        |       |
| 65-74                     | 17.83 | 28.70  | 23.25 |
| ≥75                       | 44.24 | 56.50  | 50.91 |
| Total                     | 29.41 | 42.18  | 36.00 |

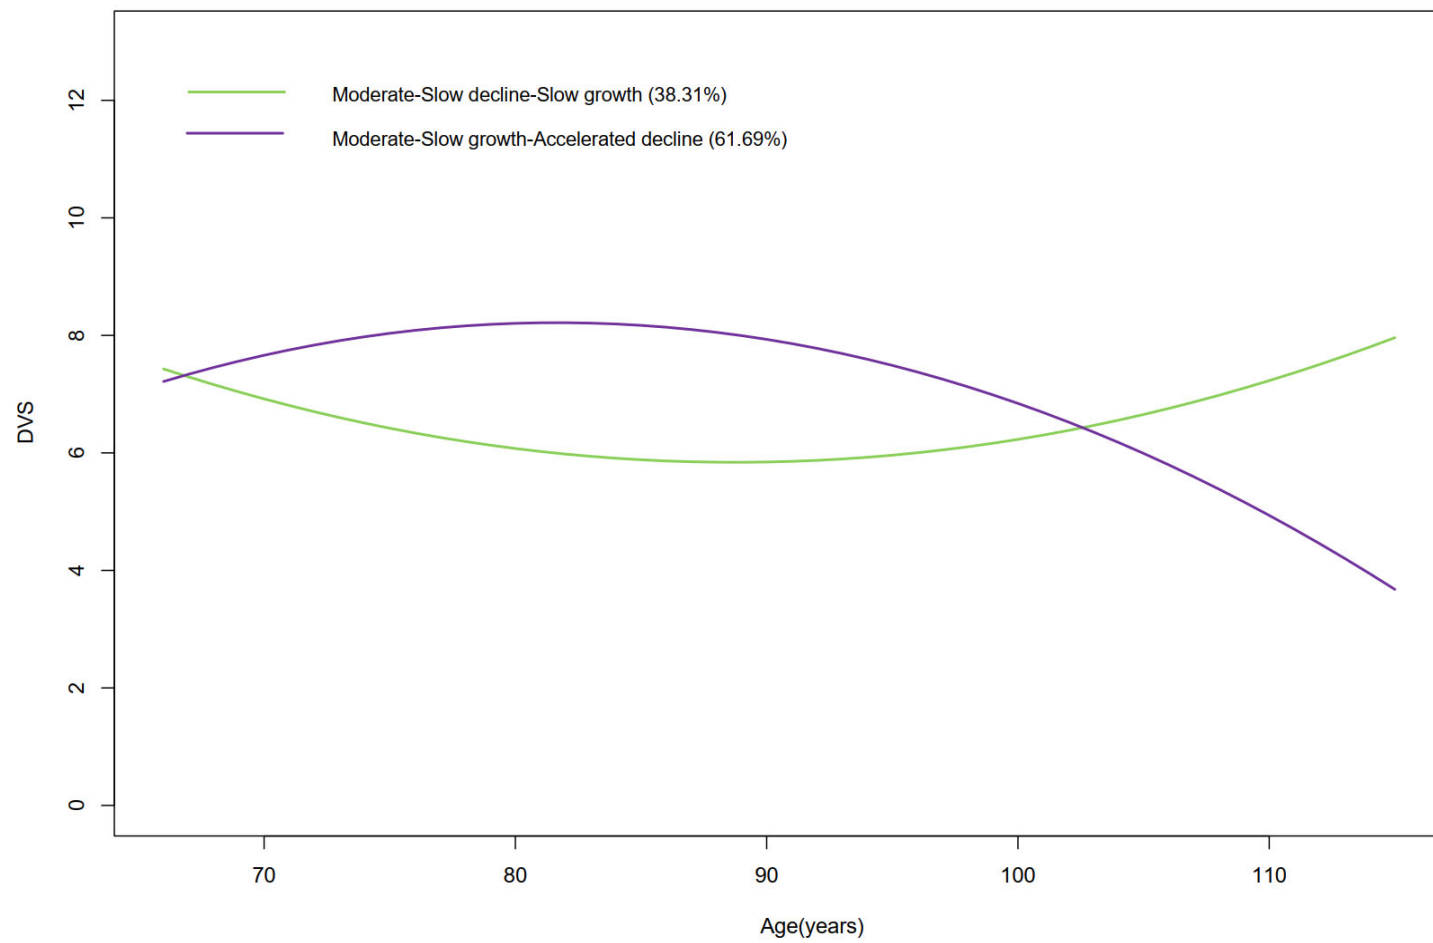

**Figure S1: Trajectories of DVS after eliminating the lowest 2% DVS in the baseline survey**

**Table S5: Logistic regression models for frailty and DVS trajectories after eliminating the lowest 2% DVS in the baseline survey**

|                  | <b>Moderate-Slow decline-Slow growth</b> | <b>Moderate-Slow growth-Accelerated decline</b> |
|------------------|------------------------------------------|-------------------------------------------------|
| Subjects, n      | 762                                      | 1227                                            |
| Frailty cases, n | 311                                      | 401                                             |
| OR (95%CI)       |                                          |                                                 |
| Model 1          | 1.267(1.025,1.565)                       | Reference                                       |
| Model 2          | 1.291(1.042,1.601)                       | Reference                                       |
| Model 3          | 1.296(1.044,1.608)                       | Reference                                       |

Model 1 was adjusted for age, sex, ethnic, illiteracy, economic status, marital status and co-residence; Model 2 was adjusted for Model 2 + smoking, drinking and physical activity; Model 3 was adjusted for Model 2 + place of birth, only-child and hungry in childhood, OR, odds ratio; CI, confidence interval.

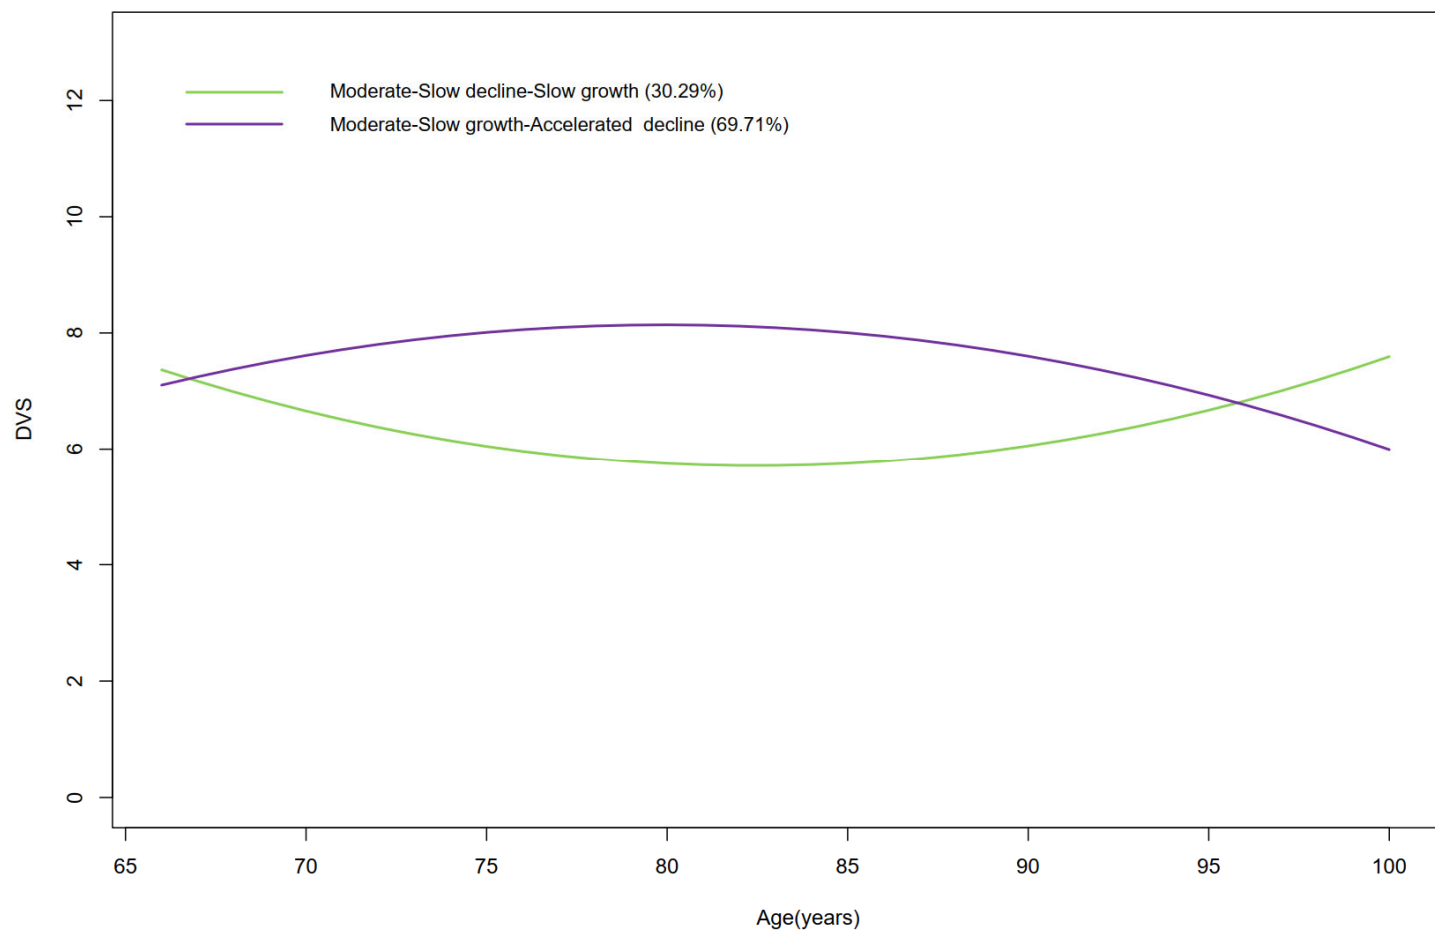

**Figure S2: Trajectories of DVS after excluding persons older than 100 years in the 2018 survey**



**Table S6: Logistic regression models for frailty and DVS trajectories after excluding persons older than 100 years in the 2018 survey**

|                  | Moderate-Slow decline-Slow growth | Moderate-Slow growth-Accelerated decline |
|------------------|-----------------------------------|------------------------------------------|
| Subjects, n      | 590                               | 1358                                     |
| Frailty cases, n | 245                               | 435                                      |
| OR (95%CI)       |                                   |                                          |
| Model 1          | 1.296(1.033,1.627)                | Reference                                |
| Model 2          | 1.320(1.050,1.661)                | Reference                                |
| Model 3          | 1.318(1.046,1.660)                | Reference                                |

Model 1 was adjusted for age, sex, ethnic, illiteracy, economic status, marital status and co-residence; Model 2 was adjusted for Model 2 + smoking, drinking and physical activity; Model 3 was adjusted for Model 2 + place of birth, only-child and hungry in childhood, OR, odds ratio; CI, confidence interval.
